# Supplementary material for: Multigene Phylogeny of Choanozoa and the Origin of Animals
Source: PubMed Central journal article supplement (PMC2346548; doi:10.1371/journal.pone.0002098), 2008-05-07
Supplement: pone.0002098.s002.pdf [file pone.0002098.s002.pdf]

## Supporting Information

### Multigene phylogeny of Choanozoa and the origin of animals

**Kamran Shalchian-Tabrizi, Marianne A. Minge, Mari Espelund, Russell Orr,**

**Torgeir Ruden, Kjetill S. Jakobsen, Thomas Cavalier-Smith**

**Supporting Table S2.** Phylogenetic distribution of sequences with homology to animal signaling and cell adhesion components.

| <b>Component function</b>                     | <b>Organism</b>       | <b>EST-ID: GO annotation and E value</b>                                        |
|-----------------------------------------------|-----------------------|---------------------------------------------------------------------------------|
| <b>Hedgehog signaling</b>                     |                       |                                                                                 |
| Hedgehog (Hint domain)                        | <i>M. vibrans</i>     | AM904772: Qua-1 7.5e-9                                                          |
| Hoglet                                        | <i>M. ovata</i>       | MNL00000104: Shha 1.2e-08                                                       |
| Hyperplastic discs homolog                    | <i>M. vibrans</i>     | AM904773: Hyperplastic discs homolog 1e-8                                       |
| <b>Receptor tyrosine kinase signaling</b>     |                       |                                                                                 |
| Ros/insulin family                            | <i>M. vibrans</i>     | AM904774: Ros1 protooncogene 2.2e-15                                            |
| Fibroblast growth factor                      | <i>M. brevicollis</i> | MRL00000285: Basic fibroblast growth factor receptor 1 precursor 2.6e-40        |
| Fibroblast growth factor                      | <i>M. ovata</i>       | MNL00000545: Acidic fibroblast growth factor intracell.-binding protein 1.4e-30 |
| Ephrin type-A receptor                        | <i>M. ovata</i>       | MNL00001478: eph receptor A4a 1.1e-17                                           |
| Ephrin type-B receptor                        | <i>M. ovata</i>       | MNL00002676: Ephrin type-B receptor 1 precursor 4.6e-25                         |
| Ephrin type-B receptor                        | <i>M. ovata</i>       | MNL00002507: Eph receptor B3 1.6e-08                                            |
| <b>Non-receptor tyrosine kinase signaling</b> |                       |                                                                                 |
| Abl tyrosine kinase                           | <i>M. brevicollis</i> | MRL00000743: Abl tyrosine kinase 4.6e-18                                        |
| Shark                                         | <i>C. owczarzaki</i>  | NUL00000096: shark, Src homology 2, ankyrin repeat, tyrosine kinase 1.1e-15     |
| <b>Notch signaling</b>                        |                       |                                                                                 |
| Notch 1                                       | <i>M. vibrans</i>     | AM949835: Notch 1 2.6e-80                                                       |
| Notch 1b                                      | <i>M. vibrans</i>     | AM949836: Notch 1b 1.1e-81                                                      |
| Notch 1b                                      | <i>M. vibrans</i>     | AM950290: Notch homolog 1b precursor 6.6e-75                                    |
| Notch 3                                       | <i>S. arctica</i>     | SAL00001646: Neurogenic locus Notch homolog protein 3 precursor 3.0e-14         |
| Notch                                         | <i>M. vibrans</i>     | AM904778: Notch homolog 3 2.0e-56                                               |
| Notch                                         | <i>M. brevicollis</i> | JGI 12238: 1.4e-131                                                             |
| Delta                                         | <i>M. vibrans</i>     | AM904779: dlc, deltaC 4.9e-42                                                   |
| ADAM 10                                       | <i>M. vibrans</i>     | AM904780: ADAM 10 4.6e-35                                                       |
| <b>Cell contact and adhesion proteins</b>     |                       |                                                                                 |
| Integrin-beta                                 | <i>M. vibrans</i>     | AM904781: Integrin-beta-like 2.5e-19                                            |
| Crumbs                                        | <i>M. vibrans</i>     | AM949838: Crumbs homolog 2 3.6e-75                                              |
| Caveolin-1                                    | <i>M. ovata</i>       | MNL00000290: Caveolin, caveolae protein 1 1.3e-09                               |
| Focal adhesion kinase 1                       | <i>C. owczarzaki</i>  | NUL00001927: Focal adhesion kinase 1 5.3e-22                                    |
| Focal adhesion kinase 1                       | <i>M. vibrans</i>     | AM904783: Focal Adhesion Kinase 1.6e-51                                         |
| Focal adhesion kinase 1                       | <i>M. brevicollis</i> | MRL00000384: Focal adhesion kinase 1 1.0e-07                                    |
| Focal adhesion kinase 1                       | <i>M. ovata</i>       | MNL00002118: Focal adhesion kinase 1 2.0e-19                                    |
| Cadherin                                      | <i>M. vibrans</i>     | AM904784: Cadherin-24 1.9e-7                                                    |
| ADAMTS                                        | <i>C. owczarzaki</i>  | NUL00000036: ADAMTS-like protein 4 precursor 3.9e-36                            |
| Selectin                                      | <i>C. owczarzaki</i>  | NUL00000949: P-selectin precursor 9.2e-16                                       |
| Tetraspanin                                   | <i>C. owczarzaki</i>  | NUL00000822: Tetraspanin-31 5.0e-31                                             |
| Sushi                                         | <i>M. ovata</i>       | MNL00000784 Csm1, CUB and Sushi multiple domains 1 3.8e-07                      |
| SHC                                           | <i>M. brevicollis</i> | MRL00001066: SHC-transforming protein 2 4.7e-09                                 |
| SHC                                           | <i>M. ovata</i>       | MNL00001125: SHC-transforming protein 2 3.1e-52                                 |
| SHC                                           | <i>M. ovata</i>       | MNL00001320: SHC-transforming protein 1 3.1e-16                                 |
| <b>ECM molecules and receptors</b>            |                       |                                                                                 |
| 40S ribosomal protein SA                      | <i>M. vibrans</i>     | AM904785: 40S ribosomal protein SA 3.8e-80                                      |
