# Supplementary material for: Multigene Phylogeny of Choanozoa and the Origin of Animals
Source: PLoS One. 2008 May 7;3(5):e2098. doi: 10.1371/journal.pone.0002098 (PMC2346548; doi:10.1371/journal.pone.0002098)
Supplement: Table S1 — (0.96 MB PDF) [file pone.0002098.s001.pdf]

|                                        | <i>Acanthamoeba castellanii</i> | <i>Allomyces macrogynus</i> | <i>Annoebidium parasiticum</i> | <i>Batrachochytrium dendrobatidis</i> | <i>Blastocladiella emersonii</i> | <i>Capsaspora owzaraki</i> | <i>Ciona intestinalis</i> | <i>Cryptococcus neoformans</i> | <i>Cunninghamella elegans</i> | <i>Dictyostelium discoideum</i> | <i>Drosophila melanogaster</i> | <i>Entamoeba histolytica</i> | <i>Homo sapiens</i> | <i>Ministeria vibrans</i> | <i>Monosiga brevicollis</i> | <i>Monosiga ovata</i> | <i>Mortierella verticillata</i> | <i>Neocallimastix patriciarum</i> | <i>Neurospora crassa</i> | <i>Oscarella carmela</i> | <i>Phanerochaete chrysosporium</i> | <i>Physarum polycephalum</i> | <i>Protospongia</i> sp. | <i>Rhizopus oryzae</i> | <i>Saccharomyces cerevisiae</i> | <i>Schizosaccharomyces pombe</i> | <i>Sphaeroforma arctica</i> | <i>Spizeliomyces punctatus</i> | <i>Taphrina deformans</i> | <i>Ustilago maydis</i> |   |
|----------------------------------------|---------------------------------|-----------------------------|--------------------------------|---------------------------------------|----------------------------------|----------------------------|---------------------------|--------------------------------|-------------------------------|---------------------------------|--------------------------------|------------------------------|---------------------|---------------------------|-----------------------------|-----------------------|---------------------------------|-----------------------------------|--------------------------|--------------------------|------------------------------------|------------------------------|-------------------------|------------------------|---------------------------------|----------------------------------|-----------------------------|--------------------------------|---------------------------|------------------------|---|
| AAA-ATPase nsf1-G                      | x                               |                             |                                |                                       | x                                | x                          | x                         | x                              |                               | x                               | x                              | x                            | x                   | x                         | x                           | x                     | x                               |                                   | x                        | x                        |                                    |                              |                         |                        | x                               | x                                |                             |                                |                           |                        | x |
| AAA-ATPase nsf1-I                      |                                 | x                           |                                | x                                     | x                                | x                          | x                         | x                              |                               | x                               | x                              | x                            | x                   | x                         | x                           | x                     | x                               | x                                 | x                        | x                        | x                                  | x                            | x                       | x                      | x                               | x                                | x                           | x                              | x                         | x                      | x |
| AAA-ATPase nsf1-J                      |                                 |                             |                                | x                                     | x                                | x                          | x                         | x                              |                               | x                               |                                |                              |                     |                           |                             |                       |                                 | x                                 | x                        | x                        |                                    | x                            | x                       | x                      | x                               | x                                | x                           | x                              | x                         | x                      | x |
| AAA-ATPase nsf1-K                      |                                 |                             | x                              |                                       | x                                | x                          |                           |                                |                               |                                 |                                |                              |                     |                           |                             |                       |                                 |                                   |                          |                          |                                    |                              |                         |                        | x                               | x                                | x                           | x                              | x                         | x                      | x |
| AAA-ATPase nsf1-M                      |                                 | x                           |                                |                                       | x                                |                            |                           |                                |                               | x                               | x                              | x                            | x                   |                           |                             |                       |                                 |                                   |                          | x                        | x                                  | x                            |                         | x                      | x                               | x                                | x                           |                                |                           |                        |   |
| AAA-ATPase nsf2-A                      |                                 |                             |                                | x                                     |                                  |                            |                           |                                |                               |                                 |                                |                              |                     | x                         |                             |                       |                                 |                                   |                          |                          |                                    |                              | x                       | x                      | x                               | x                                | x                           |                                |                           |                        |   |
| AAA-ATPase nsf2-F                      |                                 | x                           |                                |                                       |                                  |                            |                           |                                |                               |                                 |                                |                              |                     |                           |                             |                       |                                 |                                   |                          |                          |                                    |                              |                         |                        |                                 |                                  |                             |                                | x                         |                        |   |
| Actin                                  | x                               | x                           | x                              | x                                     | x                                | x                          | x                         | x                              | x                             | x                               | x                              |                              |                     |                           | x                           | x                     | x                               | x                                 | x                        | x                        | x                                  | x                            | x                       | x                      | x                               | x                                | x                           | x                              | x                         | x                      | x |
| Cytosolic chaperonin A                 |                                 |                             |                                | x                                     |                                  |                            | x                         |                                |                               | x                               |                                |                              |                     |                           |                             |                       |                                 |                                   |                          | x                        | x                                  | x                            | x                       | x                      | x                               | x                                | x                           |                                |                           |                        |   |
| Cytosolic chaperonin B                 | x                               |                             |                                | x                                     | x                                | x                          | x                         | x                              | x                             | x                               | x                              | x                            |                     |                           | x                           | x                     | x                               |                                   |                          | x                        | x                                  | x                            | x                       | x                      | x                               | x                                | x                           | x                              | x                         | x                      | x |
| Cytosolic chaperonin D                 |                                 |                             |                                | x                                     | x                                |                            | x                         | x                              |                               | x                               | x                              | x                            |                     |                           |                             |                       |                                 |                                   |                          | x                        | x                                  | x                            |                         | x                      | x                               | x                                | x                           | x                              | x                         | x                      | x |
| Cytosolic chaperonin E                 | x                               |                             | x                              | x                                     | x                                | x                          | x                         | x                              | x                             | x                               | x                              | x                            | x                   |                           | x                           | x                     | x                               |                                   |                          | x                        | x                                  | x                            |                         | x                      | x                               | x                                | x                           | x                              | x                         | x                      | x |
| Cytosolic chaperonin N                 |                                 | x                           |                                |                                       | x                                |                            | x                         | x                              |                               | x                               | x                              | x                            |                     |                           |                             |                       |                                 |                                   |                          | x                        | x                                  | x                            |                         | x                      | x                               | x                                | x                           | x                              | x                         | x                      | x |
| Cytosolic chaperonin T                 |                                 |                             |                                |                                       | x                                |                            | x                         | x                              |                               | x                               | x                              | x                            |                     |                           |                             |                       |                                 |                                   |                          | x                        | x                                  | x                            |                         | x                      | x                               | x                                | x                           | x                              | x                         | x                      | x |
| Cytosolic chaperonin Z                 | x                               |                             |                                |                                       | x                                | x                          | x                         | x                              | x                             | x                               | x                              | x                            |                     |                           |                             |                       |                                 | x                                 |                          | x                        | x                                  |                              |                         | x                      | x                               | x                                | x                           | x                              | x                         | x                      | x |
| Elongation factor 1                    | x                               |                             | x                              | x                                     |                                  |                            |                           | x                              | x                             | x                               | x                              | x                            |                     |                           |                             |                       | x                               | x                                 | x                        | x                        | x                                  | x                            |                         | x                      | x                               | x                                | x                           |                                |                           | x                      | x |
| Elongation factor 2                    |                                 | x                           | x                              | x                                     | x                                |                            |                           |                                | x                             | x                               | x                              | x                            |                     |                           | x                           | x                     | x                               |                                   |                          |                          |                                    | x                            | x                       | x                      | x                               | x                                | x                           |                                |                           |                        |   |
| Eukaryotic initiation factor 4a        |                                 |                             | x                              | x                                     |                                  |                            |                           |                                | x                             | x                               | x                              |                              |                     |                           |                             |                       |                                 |                                   |                          | x                        | x                                  |                              | x                       | x                      | x                               | x                                | x                           |                                |                           |                        |   |
| Fibrillarin                            | x                               |                             |                                |                                       | x                                |                            |                           | x                              | x                             | x                               | x                              | x                            | x                   |                           | x                           | x                     |                                 |                                   |                          | x                        | x                                  | x                            | x                       | x                      | x                               | x                                | x                           |                                |                           | x                      | x |
| Heat shock protein 90                  |                                 | x                           |                                |                                       |                                  |                            |                           |                                |                               | x                               | x                              | x                            | x                   |                           |                             |                       | x                               |                                   |                          | x                        | x                                  |                              |                         | x                      | x                               | x                                | x                           |                                |                           |                        |   |
| Initiation factor 1 g                  |                                 | x                           |                                |                                       | x                                | x                          |                           |                                |                               | x                               | x                              | x                            | x                   |                           |                             |                       |                                 |                                   |                          | x                        | x                                  |                              | x                       | x                      | x                               | x                                | x                           |                                |                           |                        |   |
| Initiation factor 1 p                  |                                 | x                           |                                |                                       |                                  |                            | x                         | x                              | x                             | x                               | x                              | x                            |                     |                           |                             |                       |                                 | x                                 |                          |                          | x                                  |                              |                         | x                      | x                               | x                                | x                           |                                |                           |                        |   |
| Initiation factor 6                    |                                 | x                           | x                              |                                       | x                                | x                          | x                         | x                              | x                             | x                               | x                              | x                            |                     |                           |                             |                       | x                               | x                                 | x                        |                          | x                                  | x                            | x                       | x                      | x                               | x                                | x                           |                                |                           |                        |   |
| Large-subunit ribosomal protein 1      | x                               | x                           | x                              | x                                     | x                                | x                          | x                         | x                              | x                             | x                               | x                              | x                            |                     |                           |                             |                       | x                               | x                                 | x                        | x                        | x                                  | x                            | x                       | x                      | x                               | x                                | x                           | x                              | x                         | x                      | x |
| Large-subunit ribosomal protein 2      | x                               | x                           | x                              | x                                     | x                                | x                          | x                         | x                              | x                             | x                               | x                              | x                            | x                   |                           |                             |                       | x                               | x                                 | x                        | x                        | x                                  | x                            | x                       | x                      | x                               | x                                | x                           | x                              | x                         | x                      | x |
| Large-subunit ribosomal protein 3      | x                               | x                           | x                              | x                                     | x                                | x                          | x                         | x                              | x                             | x                               | x                              | x                            | x                   |                           |                             |                       | x                               | x                                 | x                        | x                        | x                                  | x                            | x                       | x                      | x                               | x                                | x                           | x                              | x                         | x                      | x |
| Large-subunit ribosomal protein 4b     |                                 |                             |                                |                                       |                                  |                            |                           |                                |                               |                                 |                                |                              |                     |                           |                             |                       |                                 |                                   |                          |                          |                                    |                              |                         |                        |                                 |                                  |                             |                                |                           |                        |   |
| Large-subunit ribosomal protein 5      | x                               | x                           | x                              | x                                     | x                                | x                          | x                         | x                              | x                             | x                               | x                              | x                            |                     |                           |                             |                       |                                 |                                   |                          | x                        | x                                  | x                            | x                       | x                      | x                               | x                                | x                           | x                              | x                         | x                      | x |
| Large-subunit ribosomal protein 6      |                                 |                             |                                |                                       |                                  |                            |                           |                                |                               |                                 |                                |                              |                     |                           |                             |                       |                                 |                                   |                          |                          |                                    |                              |                         |                        |                                 |                                  |                             |                                |                           |                        |   |
| Large-subunit ribosomal protein 7a     | x                               | x                           |                                |                                       | x                                | x                          | x                         | x                              | x                             | x                               | x                              | x                            |                     |                           |                             |                       | x                               | x                                 | x                        | x                        | x                                  | x                            | x                       | x                      | x                               | x                                | x                           | x                              | x                         | x                      | x |
| Large-subunit ribosomal protein 9      | x                               | x                           | x                              | x                                     | x                                | x                          | x                         | x                              | x                             | x                               | x                              | x                            |                     |                           |                             |                       | x                               | x                                 | x                        |                          | x                                  | x                            | x                       | x                      | x                               | x                                | x                           | x                              | x                         | x                      | x |
| Large-subunit ribosomal protein 11b    | x                               | x                           | x                              | x                                     | x                                | x                          | x                         | x                              | x                             | x                               | x                              | x                            |                     |                           |                             |                       | x                               | x                                 | x                        | x                        | x                                  | x                            | x                       | x                      | x                               | x                                | x                           | x                              | x                         | x                      | x |
| Large-subunit ribosomal protein 12b    | x                               | x                           | x                              | x                                     | x                                | x                          | x                         | x                              | x                             | x                               | x                              | x                            |                     |                           |                             |                       | x                               | x                                 | x                        | x                        | x                                  | x                            | x                       | x                      | x                               | x                                | x                           | x                              | x                         | x                      | x |
| Large-subunit ribosomal protein 13     |                                 |                             |                                |                                       | x                                | x                          | x                         | x                              | x                             | x                               | x                              | x                            |                     |                           |                             |                       |                                 |                                   |                          |                          |                                    |                              | x                       | x                      | x                               | x                                | x                           | x                              | x                         | x                      | x |
| Large-subunit ribosomal protein 14     | x                               |                             | x                              |                                       |                                  |                            |                           |                                |                               |                                 |                                |                              |                     |                           |                             |                       | x                               | x                                 | x                        | x                        | x                                  |                              |                         | x                      | x                               | x                                | x                           | x                              | x                         | x                      | x |
| Large-subunit ribosomal protein 15     | x                               | x                           | x                              | x                                     | x                                | x                          | x                         | x                              | x                             | x                               | x                              | x                            |                     |                           |                             |                       | x                               | x                                 | x                        | x                        | x                                  | x                            |                         |                        | x                               | x                                | x                           | x                              | x                         | x                      | x |
| Large-subunit ribosomal protein 16     | x                               | x                           | x                              | x                                     | x                                | x                          | x                         | x                              | x                             | x                               | x                              | x                            |                     |                           |                             |                       | x                               | x                                 | x                        | x                        | x                                  | x                            | x                       | x                      | x                               | x                                | x                           | x                              | x                         | x                      | x |
| Large-subunit ribosomal protein 17     | x                               | x                           |                                |                                       | x                                | x                          | x                         | x                              | x                             | x                               | x                              | x                            |                     |                           |                             |                       | x                               | x                                 | x                        | x                        | x                                  | x                            | x                       | x                      | x                               | x                                | x                           | x                              | x                         | x                      | x |
| Large-subunit ribosomal protein 18     | x                               | x                           | x                              | x                                     | x                                | x                          | x                         | x                              | x                             | x                               | x                              | x                            |                     |                           |                             |                       | x                               | x                                 | x                        | x                        | x                                  | x                            | x                       | x                      | x                               | x                                | x                           | x                              | x                         | x                      | x |
| Large-subunit ribosomal protein 19     | x                               | x                           | x                              | x                                     | x                                | x                          | x                         | x                              | x                             | x                               | x                              | x                            |                     |                           |                             |                       | x                               | x                                 | x                        | x                        | x                                  | x                            | x                       | x                      | x                               | x                                | x                           | x                              | x                         | x                      | x |
| Large-subunit ribosomal protein 20     |                                 |                             | x                              |                                       |                                  |                            |                           |                                |                               |                                 |                                |                              |                     |                           |                             |                       |                                 |                                   |                          | x                        | x                                  | x                            |                         |                        | x                               | x                                | x                           | x                              | x                         | x                      | x |
| Large-subunit ribosomal protein 27     | x                               | x                           | x                              | x                                     | x                                | x                          | x                         | x                              | x                             | x                               | x                              | x                            |                     |                           |                             |                       | x                               | x                                 | x                        | x                        | x                                  | x                            | x                       | x                      | x                               | x                                | x                           | x                              | x                         | x                      | x |
| Large-subunit ribosomal protein 30     | x                               | x                           | x                              | x                                     | x                                | x                          | x                         | x                              | x                             | x                               | x                              | x                            |                     |                           |                             |                       | x                               | x                                 | x                        |                          | x                                  | x                            | x                       | x                      | x                               | x                                | x                           | x                              | x                         | x                      | x |
| Large-subunit ribosomal protein 32     | x                               | x                           | x                              | x                                     | x                                | x                          | x                         | x                              | x                             | x                               | x                              | x                            |                     |                           |                             |                       | x                               | x                                 | x                        | x                        | x                                  | x                            | x                       | x                      | x                               | x                                | x                           | x                              | x                         | x                      | x |
| Large-subunit ribosomal protein 35     | x                               |                             |                                |                                       | x                                | x                          | x                         | x                              | x                             | x                               | x                              | x                            |                     |                           |                             |                       | x                               | x                                 | x                        | x                        | x                                  | x                            | x                       | x                      | x                               | x                                | x                           | x                              | x                         | x                      | x |
| Large-subunit ribosomal protein 37     | x                               | x                           | x                              | x                                     | x                                | x                          | x                         | x                              | x                             | x                               | x                              | x                            |                     |                           |                             |                       | x                               | x                                 | x                        | x                        | x                                  | x                            | x                       | x                      | x                               | x                                | x                           | x                              | x                         | x                      | x |
| Large-subunit ribosomal protein 42     | x                               | x                           | x                              | x                                     | x                                | x                          | x                         | x                              | x                             | x                               | x                              | x                            |                     |                           |                             |                       | x                               | x                                 | x                        | x                        | x                                  | x                            | x                       | x                      | x                               | x                                | x                           | x                              | x                         | x                      | x |
| Large-subunit ribosomal protein 43     | x                               | x                           | x                              |                                       |                                  |                            |                           |                                |                               |                                 |                                |                              |                     |                           |                             |                       |                                 |                                   |                          |                          |                                    |                              |                         |                        |                                 |                                  |                             |                                |                           |                        |   |
| Methionine adenosyltransferase 1       |                                 |                             |                                |                                       | x                                | x                          | x                         | x                              | x                             | x                               | x                              | x                            |                     |                           |                             |                       |                                 |                                   |                          | x                        | x                                  | x                            | x                       | x                      | x                               | x                                | x                           | x                              | x                         | x                      | x |
| Mitochondrial chaperonin 60            |                                 |                             |                                |                                       |                                  |                            |                           | x                              | x                             | x                               | x                              | x                            |                     |                           |                             |                       |                                 |                                   |                          | x                        | x                                  |                              |                         |                        | x                               | x                                | x                           | x                              | x                         | x                      | x |
| Proteasome AAA-ATPase reg. su D        | x                               | x                           |                                | x                                     | x                                | x                          | x                         | x                              | x                             | x                               | x                              | x                            |                     |                           |                             |                       | x                               |                                   |                          | x                        | x                                  |                              |                         | x                      | x                               | x                                | x                           | x                              | x                         | x                      | x |
| Proteasome AAA-ATPase reg. su E        | x                               | x                           | x                              | x                                     | x                                | x                          | x                         | x                              | x                             | x                               | x                              | x                            |                     |                           |                             |                       | x                               |                                   |                          | x                        | x                                  |                              |                         | x                      | x                               | x                                | x                           | x                              | x                         | x                      | x |
| Ribosomal protein L10 (grc5)           | x                               | x                           | x                              |                                       | x                                | x                          | x                         | x                              | x                             | x                               | x                              | x                            |                     |                           |                             |                       | x                               | x                                 | x                        | x                        | x                                  | x                            | x                       | x                      | x                               | x                                | x                           | x                              | x                         | x                      | x |
| Ribosomal protein p0                   | x                               | x                           | x                              | x                                     | x                                | x                          | x                         | x                              | x                             | x                               | x                              | x                            |                     |                           |                             |                       | x                               | x                                 | x                        | x                        | x                                  | x                            | x                       | x                      | x                               | x                                | x                           | x                              | x                         | x                      | x |
| Ribosomal protein S12/L30/L7a family A |                                 |                             |                                |                                       |                                  |                            |                           |                                |                               |                                 |                                |                              |                     |                           |                             |                       |                                 |                                   |                          | x                        | x                                  | x                            | x                       | x                      | x                               | x                                | x                           | x                              | x                         | x                      | x |
| Ribosomal protein S2                   | x                               | x                           | x                              | x                                     | x                                | x                          | x                         | x                              | x                             | x                               | x                              | x                            |                     |                           |                             |                       | x                               | x                                 | x                        | x                        | x                                  | x                            | x                       | x                      | x                               | x                                | x                           | x                              | x                         | x                      | x |
| Seryl tRNA synthetase                  | x                               |                             |                                |                                       |                                  |                            |                           |                                |                               |                                 |                                |                              |                     |                           |                             |                       |                                 |                                   |                          |                          | x                                  |                              |                         |                        |                                 |                                  |                             |                                |                           |                        |   |
| Small-subunit ribosomal protein 1      | x                               | x                           | x                              | x                                     | x                                | x                          | x                         | x                              | x                             | x                               | x                              | x                            |                     |                           |                             |                       | x                               | x                                 | x                        | x                        | x                                  | x                            | x                       | x                      | x                               | x                                | x                           | x                              | x                         | x                      | x |
| Small-subunit ribosomal protein 2      | x                               | x                           | x                              | x                                     | x                                | x                          | x                         | x                              | x                             | x                               | x                              | x                            |                     |                           |                             |                       | x                               | x                                 | x                        | x                        | x                                  | x                            | x                       | x                      | x                               | x                                | x                           | x                              | x                         | x                      | x |
| Small-subunit ribosomal protein 3      | x                               | x                           |                                |                                       |                                  |                            |                           |                                |                               |                                 |                                |                              |                     |                           |                             |                       |                                 |                                   |                          | x                        | x                                  | x                            | x                       | x                      | x                               | x                                | x                           | x                              | x                         | x                      | x |
| Small-subunit ribosomal protein 4      | x                               | x                           | x                              | x                                     | x                                | x                          | x                         | x                              | x                             | x                               | x                              | x                            |                     |                           |                             |                       | x                               | x                                 | x                        | x                        | x                                  | x                            | x                       | x                      | x                               | x                                | x                           | x                              | x                         | x                      | x |
| Small-subunit ribosomal protein 5      | x                               | x                           | x                              | x                                     | x                                | x                          | x                         | x                              | x                             | x                               | x                              | x                            |                     |                           |                             |                       | x                               | x                                 | x                        | x                        | x                                  | x                            | x                       | x                      | x                               | x                                | x                           | x                              | x                         | x                      | x |
| Small-subunit ribosomal protein 6      | x                               | x                           | x                              | x                                     | x                                | x                          | x                         | x                              | x                             | x                               | x                              | x                            |                     |                           |                             |                       | x                               | x                                 | x                        | x                        | x                                  | x                            | x                       | x                      | x                               | x                                | x                           | x                              | x                         | x                      | x |
| Small-subunit ribosomal protein 8      | x                               | x                           | x                              | x                                     | x                                | x                          | x                         | x                              | x                             | x                               | x                              | x                            |                     |                           |                             |                       | x                               | x                                 | x                        | x                        | x                                  | x                            | x                       | x                      | x                               | x                                | x                           | x                              | x                         | x                      | x |
| Small-subunit ribosomal protein 10     |                                 |                             |                                |                                       | x                                | x                          | x                         | x                              | x                             | x                               | x                              | x                            |                     |                           |                             |                       | x                               | x                                 | x                        | x                        | x                                  | x                            | x                       | x                      | x                               | x                                | x                           | x                              | x                         | x                      | x |
| Small-subunit ribosomal protein 11     | x                               | x                           |                                |                                       | x                                | x                          | x                         | x                              | x                             | x                               | x                              | x                            |                     |                           |                             |                       | x                               | x                                 | x                        | x                        | x                                  | x                            | x                       | x                      | x                               | x                                | x                           | x                              | x                         | x                      | x |
| Small-subunit ribosomal protein 14     |                                 | x                           | x                              | x                                     | x                                | x                          | x                         | x                              | x                             | x                               | x                              | x                            |                     |                           |                             |                       | x                               | x                                 | x                        | x                        | x                                  | x                            | x                       | x                      | x                               | x                                | x                           | x                              | x                         | x                      | x |
| Small-subunit ribosomal protein 16     | x                               | x                           | x                              | x                                     | x                                | x                          | x                         | x                              | x                             | x                               | x                              | x                            |                     |                           |                             |                       | x                               | x                                 | x                        | x                        | x                                  | x                            | x                       | x                      | x                               | x                                | x                           | x                              | x                         | x                      | x |
| Small-subunit ribosomal protein 18     |                                 |                             |                                | x                                     | x                                | x                          | x                         | x                              | x                             | x                               | x                              | x                            |                     |                           |                             |                       | x                               | x                                 | x                        | x                        | x                                  | x                            | x                       | x                      | x                               | x                                | x                           | x                              | x                         | x                      | x |
| Small-subunit ribosomal protein 22a    | x                               | x                           | x                              | x                                     | x                                | x                          | x                         | x                              | x                             | x                               | x                              | x                            |                     |                           |                             |                       | x                               | x                                 | x                        | x                        | x                                  | x                            | x                       | x                      | x                               | x                                | x                           | x                              | x                         | x                      | x |
| Small-subunit ribosomal protein 23     | x                               | x                           | x                              |                                       | x                                | x                          | x                         | x                              | x                             | x                               | x                              | x                            |                     |                           |                             |                       | x                               | x                                 | x                        | x                        | x                                  | x                            | x                       | x                      | x                               | x                                | x                           | x                              | x                         | x                      | x |
| Succinate CoA ligase                   |                                 |                             |                                |                                       | x                                | x                          | x                         | x                              | x                             | x                               | x                              | x                            |                     |                           |                             |                       | x                               | x                                 | x                        |                          | x                                  | x                            | x                       | x                      | x                               | x                                | x                           | x                              | x                         | x                      | x |
| Threonyl-tRNA synthetase               | x                               | x                           |                                | x                                     |                                  |                            | x                         |                                |                               | x                               |                                |                              |                     |                           |                             |                       |                                 |                                   |                          |                          | x                                  |                              |                         |                        |                                 |                                  |                             |                                |                           |                        |   |
| Topoisomerase I                        |                                 |                             |                                |                                       |                                  |                            |                           | x                              | x                             | x                               | x                              |                              |                     |                           |                             |                       | x                               |                                   |                          | x                        |                                    |                              |                         |                        |                                 |                                  |                             |                                |                           |                        |   |
